# Supplementary material
Source: publisher figshare collection journal article supplement (https://geolsoc.figshare.com/articles/dataset/_/3454829)
Supplement: Supplementary file 1 [file 1]

Supplementary Table 3. Apatite chemistry indicators

| Sample No. | Dpar<br>( $\mu\text{m}$ ) | Chlorine<br>(wt %) |
|------------|---------------------------|--------------------|
| OCO 05-I   | 1.72–2.0                  | 0.34               |
| OCO 02     | 2.13–2.46                 | 0.07               |
| OCO 03     | 2.05–2.88                 | 0.76               |
| OCO 04     | 1.84–2.37                 | 0.70               |
| OCO 05     | 1.64–1.77                 | 0.33               |
| OCO 06     | 1.65–2.16                 | 0.28               |
| OCO 07     | 1.74–2.25                 | 0.43               |
| OCO 08     | 1.86–2.57                 | 0.72               |
| OCO 09     | 1.59–2.45                 | 0.53               |
| OCO 10     | 2.29–2.97                 | n.d. <sup>1</sup>  |
| OCO 11     | 1.47–1.77                 | 0.18               |
| OCO 12     | 1.83–2.41                 | 0.65               |
| OCO 16     | 1.46–1.68                 | 0.61               |
| OCO 17     | <1.5                      | n.d.               |
| OCO 18     | 2.39–2.67                 | n.d.               |
| OCO 19     | 1.92–2.06                 | 0.19               |
| OCO 23     | 2.02–2.41                 | 0.10               |
| OCO 24     | 1.34–1.92                 | 0.02               |
| OCO 25     | 1.80–2.72                 | 0.48               |
| OCO 26     | 1.96–2.40                 | 0.66               |
| COTA 01    | 1.23–2.31                 | n.d.               |

Note: n.d. = no data
