# Supplementary material
Source: publisher figshare collection journal article supplement (https://geolsoc.figshare.com/articles/dataset/_/3454829)
Supplement: Supplementary file 3 [file 1]

Supplementary Table 1. Analytical fission-track results for Ocoña canyon, Peru

| Sample name | Mineral | Location             |         | Elev. (m) | No. of crystals | Track densities |                |                   |                |                |                | Age dispersion  |      | Central age (Ma±1σ) | Mean track length (μm) | S.D. (μm) | No. of tracks |
|-------------|---------|----------------------|---------|-----------|-----------------|-----------------|----------------|-------------------|----------------|----------------|----------------|-----------------|------|---------------------|------------------------|-----------|---------------|
|             |         | Lat. S (UTM Zone 18) | Long. W |           |                 | Central age     |                | Mean track length |                | S.D.           |                | Pχ <sup>2</sup> | RE   |                     |                        |           |               |
|             |         |                      |         |           |                 | ρ <sub>d</sub>  | N <sub>d</sub> | ρ <sub>s</sub>    | N <sub>s</sub> | ρ <sub>i</sub> | N <sub>i</sub> |                 |      |                     |                        |           |               |
|             |         |                      |         |           |                 |                 |                |                   |                |                |                |                 |      |                     |                        |           |               |
| OCO 05 I    | Apatite | 0712032              | 8268974 | 1800      | 14              | 1.272           | 5290           | 0.236             | 109            | 0.544          | 280            | 16.2            | 19.7 | 84.5±10.6           | none                   |           |               |
| COTA 01     | Apatite | 0739753              | 8328002 | 2770      | 10              | 1.298           | 3597           | 0.328             | 89             | 1.043          | 281            | 62.3            | 0.1  | 69.3±8.5            | none                   |           |               |
| OCO 02      | Apatite | 0726433              | 8254464 | 2790      | 18              | 1.272           | 5290           | 0.867             | 405            | 1.827          | 872            | 59.7            | 0.7  | 99.4±6.1            | none                   |           |               |
| OCO 03      | Apatite | 0715850              | 8252013 | 1800      | 20              | 1.272           | 5290           | 1.299             | 658            | 3.474          | 1785           | 0.11            | 22.0 | 79.4±5.5            | 11.89±0.16             | 1.21      | 56            |
| OCO 04      | Apatite | 0715850              | 8252013 | 1740      | 20              | 1.272           | 5290           | 0.704             | 664            | 1.993          | 1874           | 0.17            | 21.4 | 76.5±5.2            | 13.45±0.13             | 1.01      | 75            |
| OCO 05      | Apatite | 0718865              | 8251918 | 2200      | 19              | 1.272           | 5290           | 0.056             | 372            | 1.696          | 1073           | 19.7            | 14.6 | 74.6±5.3            | none                   |           |               |
| OCO 06      | Apatite | 0724149              | 8273472 | 3700      | 20              | 1.298           | 3597           | 0.054             | 390            | 1.586          | 1162           | 72.8            | 0.7  | 73.4±4.5            | none                   |           |               |
| OCO 07      | Apatite | 0723531              | 8272655 | 3280      | 10              | 1.298           | 3597           | 0.682             | 186            | 1.929          | 546            | 21.6            | 10.8 | 75.9±7.1            | 14.17±0.18             | 1.16      | 41            |
| OCO 08      | Apatite | 0724478              | 8273181 | 3800      | 7               | 1.272           | 5290           | 0.823             | 139            | 2.651          | 395            | 33.5            | 41.6 | 68.3±13.1           | 14.79±0.26             | 0.91      | 12            |
| OCO 09      | Apatite | 0718732              | 8273505 | 3600      | 17              | 1.298           | 3597           | 1.178             | 527            | 3.145          | 1413           | 25.7            | 0.04 | 87.1±7.4            | 14.49±0.17             | 1.08      | 39            |
| OCO 10      | Apatite | 0708069              | 8253850 | 1300      | 10              | 1.298           | 3597           | 2.221             | 355            | 6.505          | 1018           | 80.7            | 0.0  | 76.3±4.9            | 13.52±0.10             | 0.99      | 100           |
| OCO 11      | Apatite | 0705175              | 8254271 | 600       | 20              | 1.272           | 5290           | 1.207             | 814            | 4.234          | 2834           | 12.3            | 10.3 | 61.6±3.0            | 12.82±0.13             | 1.28      | 101           |
| OCO 12      | Apatite | 0706528              | 8254518 | 700       | 15              | 1.272           | 5290           | 2.043             | 699            | 6.690          | 2307           | 77.6            | 0.0  | 65.0±2.9            | 13.29±0.10             | 0.98      | 105           |
| OCO 16      | Apatite | 0704116              | 8254322 | 1290      | 16              | 1.272           | 5290           | 0.628             | 455            | 2.705          | 1976           | 3.9             | 16.1 | 49.7±3.4            | 13.35±0.34             | 1.50      | 20            |
| OCO 17      | Apatite | 0702020              | 8278995 | 1010      | 16              | 1.272           | 5290           | 0.065             | 56             | 0.951          | 804            | 4.5             | 48.6 | 16.6±3.1            | none                   |           |               |
| OCO 18      | Apatite | 0703237              | 8280060 | 1020      | 11              | 1.298           | 3597           | 0.133             | 46             | 2.358          | 852            | 54.9            | 0.3  | 11.9±1.8            | none                   |           |               |
| OCO 19      | Apatite | 0705231              | 8270936 | 1050      | 15              | 1.272           | 5290           | 0.252             | 144            | 1.115          | 612            | 5.4             | 26.9 | 54.3±26.9           | none                   |           |               |
| OCO 23      | Apatite | 0690198              | 8260556 | 2590      | 21              | 1.298           | 3597           | 0.368             | 256            | 1.102          | 793            | 69.7            | 1.1  | 70.6±5.2            | 14.65±0.16             | 1.16      | 52            |
| OCO 24      | Apatite | 0693442              | 8242161 | 1930      | 20              | 1.272           | 5290           | 1.368             | 1936           | 3.596          | 5290           | 19.4            | 11.5 | 79.2±4.2            | 13.49±0.19             | 1.30      | 48            |
| OCO 25      | Apatite | 0691617              | 8234000 | 1110      | 20              | 1.272           | 5290           | 1.031             | 664            | 2.208          | 5290           | 32.9            | 6.6  | 97.4±5.0            | 14.84±0.21             | 1.34      | 40            |
| OCO 26      | Apatite | 0692604              | 8234861 | 1280      | 20              | 1.272           | 5290           | 1.137             | 2068           | 2.782          | 5290           | 1.0             | 16.6 | 89.0±5.1            | 13.81±0.10             | 1.01      | 103           |
| OCO-04-01   | Apatite | 0719120              | 8550500 | 2400      | 21              | 1.106           | 6131           | 0.666             | 633            | 1.413          | 1343           | 40.9            | 7.4  | 87.7±4.6            | 13.43±0.10             | 1.04      | 101           |
|             | Zircon  |                      |         | 2400      | 15              | 0.457           | 3450           | 10.08             | 2278           | 3.076          | 695            | 9.0             | 7.9  | 98.5±5.0            |                        |           |               |
| OCO-04-04   | Apatite | 0713050              | 8243530 | 1000      | 22              | 1.106           | 6131           | 0.376             | 453            | 0.781          | 939            | 3.1             | 17.6 | 90.6±6.5            | 12.71±0.11             | 0.96      | 75            |
|             | Zircon  |                      |         | 1000      | 20              | 0.474           | 3450           | 9.089             | 4321           | 2.247          | 1068           | 2.4             | 10.6 | 119.5±5.5           |                        |           |               |
| OCO-04-06   | Apatite | 0701732              | 8237747 | 500       | 20              | 1.106           | 6131           | 0.569             | 774            | 1.158          | 1575           | 10.0            | 3.6  | 91.3±4.2            | 13.45±0.10             | 0.97      | 100           |
|             | Zircon  |                      |         | 500       | 20              | 0.472           | 3450           | 9.563             | 3844           | 2.32           | 933            | 0.6             | 14.4 | 120.6±6.5           |                        |           |               |

| Sample name | Mineral | Location             |         | Elev. (m) | No. of crystals | Track densities |                |                   |                |                |                | Age dispersion  |      | Central age (Ma±1σ) | Mean track length (μm) | S.D. (μm) | No. of tracks |
|-------------|---------|----------------------|---------|-----------|-----------------|-----------------|----------------|-------------------|----------------|----------------|----------------|-----------------|------|---------------------|------------------------|-----------|---------------|
|             |         | Lat. S (UTM Zone 18) | Long. W |           |                 | Central age     |                | Mean track length |                | S.D.           |                | Pχ <sup>2</sup> | RE   |                     |                        |           |               |
|             |         |                      |         |           |                 | ρ <sub>d</sub>  | N <sub>d</sub> | ρ <sub>s</sub>    | N <sub>s</sub> | ρ <sub>i</sub> | N <sub>i</sub> |                 |      |                     |                        |           |               |
| OCO-04-07   | Apatite | 0698800              | 8243130 | 1690      | 21              | 1.106           | 6131           | 0.516             | 819            | 1.42           | 2252           | 57.6            | 0.0  | 68.3±3.0            | 12.33±0.13             | 1.33      | 101           |
|             | Zircon  |                      |         | 1690      | 14              | 0.469           | 3450           | 15.72             | 4406           | 3.928          | 1100           | 9.4             | 7.1  | 118.1±5.0           |                        |           |               |
| OCO-04-09   | Apatite | 0700180              | 8243200 | 1200      | 20              | 1.106           | 6131           | 1.517             | 1363           | 3.649          | 3277           | 8.2             | 1.7  | 78.0±2.9            | 12.42±0.11             | 1.17      | 100           |
|             | Zircon  |                      |         | 1200      | 17              | 0.469           | 3450           | 14.44             | 4513           | 3.311          | 1061           | 0.4             | 14.6 | 125.6±6.6           |                        |           |               |
| OCO-04-10   | Apatite | 0699787              | 8240343 | 600       | 20              | 1.106           | 6131           | 4.325             | 2446           | 7.657          | 4330           | 0.5             | 10.6 | 105.0±3.9           | 13.53±0.10             | 1.05      | 100           |
|             | Zircon  |                      |         | 600       | 15              | 0.465           | 3450           | 9.297             | 2487           | 2.299          | 615            | 1.1             | 15.6 | 114.4±7.3           |                        |           |               |

Notes: AFT and ZFT age determinations were carried out at the UCL–Birkbeck Thermochronometry laboratories, London. Samples for AFT analysis were irradiated at the well-thermalised (Cd ratio for Au >100) Hifar reactor, Lucas Heights, Australia, using the Corning CN5 glass dosimeter. Analyses were carried out on a Zeiss Axioplan microscope at a magnification of x1250, using a dry (x100) objective. Confined track length measurements were made using a digitizing tablet calibrated against a stage micrometer. Single-grain AFT ages were calculated using the external detector method and the zeta calibration approach, as recommended by the I.U.G.S. Subcommittee on Geochronology (Hurford, 1990). Track length measurements were restricted to confined tracks parallel to the crystal polishing plane. (i) Track densities are ( $\times 10^6$  tr  $\text{cm}^{-2}$ ) numbers of tracks counted (N) shown in brackets; (ii) analyses by external detector method using 0.5 for the  $4\pi/2\pi$  geometry correction factor; (iii) ages calculated using dosimeter glass CN-5 (apatite),  $\zeta_{\text{CN5}} = 333 \pm 5$ ; CN-2 (zircon),  $\zeta_{\text{CN5}} = 127 \pm 5$  calibrated by multiple analyses of IUGS apatite and zircon age standards; (iv)  $P\chi^2$  is probability for obtaining  $\chi^2$  value for n degrees of freedom, where n = no. crystals – 1; (v) Central age is a modal age, weighted for different precisions of individual crystals.

Reference: HURFORD, A.J. 1990. Standardization of Fission track dating calibration: recommendation by the Fission Track Working Group of the I.U.G.S. Subcommittee on Geochronology. *Chemical Geology*, **80**, 171–178.
